# Supplementary material for: Development of the Rabbit NASH Model Resembling Human NASH and Atherosclerosis
Source: MDPI journal article supplement (doi:10.3390/biomedicines11020384), 2023-01-27

## Supporting information

**Supplementary Table 1. Nutrient composition of the control diet (LRC4).**

**• Nutrient composition (per 100 g of diet)**

|                             |             | <b>unit</b> |
|-----------------------------|-------------|-------------|
| Water                       | 8.5 ± 0.3   | g           |
| Crude protein               | 18.4 ± 0.3  | g           |
| Crude fat                   | 3.0 ± 0.1   | g           |
| Crude ash                   | 8.3 ± 0.4   | g           |
| Crude fiber                 | 16.7 ± 0.7  | g           |
| Nitrogen free extract (NFE) | 45.1 ± 0.7  | g           |
| Energy                      | 280.6 ± 2.5 | kcal        |
|                             |             |             |
| Vitamin A                   | 303 ± 139   | IU          |
| Vitamin D3                  | 89 ± 43     | IU          |
| Vitamin E                   | 6.5 ± 0.5   | mg          |
| Vitamin B <sub>1</sub>      | 0.76 ± 0.07 | mg          |
| Vitamin B <sub>2</sub>      | 1.29 ± 0.11 | mg          |
| Vitamin C                   | 58 ± 8      | mg          |
|                             |             |             |
| Calcium                     | 1.14 ± 0.06 | g           |
| Phosphorus                  | 0.52 ± 0.03 | g           |
| Magnesium                   | 0.31 ± 0.03 | g           |
| Sodium                      | 0.19 ± 0.05 | g           |
| Potassium                   | 1.64 ± 0.12 | g           |

**Supplementary Table 2. Primer sequence used for real-time PCR**

| <b>Gene</b> | <b>Accession number</b> | <b>Primer sequence (5' - 3')</b>                                       |
|-------------|-------------------------|------------------------------------------------------------------------|
| GAPDH       | NM_001082253            | F 5'-GGCAAAGTGGATGTTGTCGC-3'<br>R 5'-GATCTCGCTCCTGGAAGATGG-3'          |
| ABCA1       | XM_008257418.2          | F 5'-GGCGCTGACTCAAGATGTCTCT-3'<br>R 5'-TACGGCAGCACATAGGTCAG-3'         |
| ABCB11      | NM_001082083.1          | F 5'-GAGGGAACCTACCAGGACAGTTTAAGA-3'<br>R 5'-TGCCAGGTAAGAAAGCTGAGACT-3' |
| ABCG5       | XM_008254466.2          | F 5'-TTGAGTGCGCCTACAAGGAA-3'<br>R 5'-CACCGCCTGCTTATTCCTCA-3'           |
| ABCG8       | XM_017340804.1          | F 5'-TGTCACCTCCAAATGCCACTC-3'<br>R 5'-GACAATGTAGGCGCAGTGCT-3'          |
| ACACA       | XM_008271162.2          | F 5'-ACCATTAGCCTGGTGACGTG-3'<br>R 5'-CCCAGCGCCTGTGAGAATTA-3'           |
| ACADL       | XM_002712562.3          | F 5'-GACAAATCGTGAAGCTCGCTC-3'<br>R 5'-GCTGGCAACCGTACATCTTC-3'          |
| ACADM       | XM_002715911.3          | F 5'-TTGGGTTGACTGAACAGCAG-3'<br>R 5'-AGGGACAGGGTATTCACCAG-3'           |
| ACAT2       | XM_002714983.3          | F 5'-CAATGGCAGGTGAGTCGAGA-3'<br>R 5'-TCACTTCGGTAGGCCCTTTC-3'           |
| ACOX1       | XM_008250924.2          | F 5'-CCGGGCAGCCAGATTAGTAG-3'<br>R 5'-GCTCGAACAAGGTCCACAGA-3'           |
| ACSL1       | XM_008250560.2          | F 5'-ACAAGTGGAACCACAGGCAA-3'<br>R 5'-TGAGGCTTAGGGCCAATCAA-3'           |
| ACTA2       | NM_001101682.2          | F 5'-CCCACAACGTGCCCATCTAT-3'<br>R 5'-CACGTTTCAGCAGTAGTCACG-3'          |
| APOB        | XM_008254783.2          | F 5'-TCGACGTAGGCCATATGCAG-3'<br>R 5'-TGCTGCTCCTAGCAAAGTCC-3'           |
| ASC         | XM_002721750.3          | F 5'-GGGATCAAGGCCCATCTGA-3'<br>R 5'-GCTGAAGAGCTTCCTCATCTTG-3'          |
| BIM         | XM_017340061.1          | F 5'-CGGATCGGAGACGAGTTCAA-3'<br>R 5'-AATGCATCCTCCACACCAGG-3'           |
| CASP1       | XM_008262043.2          | F 5'-ACTGCCAGAAGGTAGGACAC-3'<br>R 5'-GATAGCACTCTTGGCTTCGTAT-3'         |
| CAT         | XM_002709045.3          | F 5'-GCTGAGAAGCCTAAGAACGC-3'                                           |

|         |                |                                                                  |
|---------|----------------|------------------------------------------------------------------|
| CCL2    | NM_001082294.1 | R 5'-TGGAAAGCTGGGTGAGCATC-3'<br>F 5'-GCTGTGATCTTCATGACCAAAC-3'   |
| CD14    | NM_001082195.2 | R 5'-CGTGTGTTCTTGGGTTGTGG-3'<br>F 5'-CCATCAATTATGGAGCCCGT-3'     |
| CD36    | XM_008258299.2 | R 5'-AAGTTGCAGACACAGCGGAT-3'<br>F 5'-TGCTAGACATCGGCAAGTGT-3'     |
| CD68    | XM_008270775.2 | R 5'-AGCCGCTTTGCAAACGTAA-3'<br>F 5'-TCCCAAGAGAGGGAAGAGGG-3'      |
| COL1A1  | XM_017348831.1 | R 5'-CCCTGGGCTGCGTGTAG-3'<br>F 5'-TAAAGGGTCACCGTGGCTTC-3'        |
| COL3A1  | XM_002712333.3 | R 5'-GAGGCCGTTGAGTCCATCTT-3'<br>F 5'-CCACTCGGACTTGCAGGAAT-3'     |
| CPT1    | XM_008252852.2 | R 5'-GCTTCCCACTTTCACCCTTG-3'<br>F 5'-TTAACAAACTGTGTCCTGTGGC-3'   |
| CTGF    | XM_017345378.1 | R 5'-AGCTTCAGCGATTGCCCAGA-3'<br>F 5'-AACATTAAGAAGGGCAAGAAGTGC-3' |
| CYBB    | NM_001082100.1 | R 5'-ATCGGCCATCGGTGCATAC-3'<br>F 5'-GGATGAGTCCCAGGCCAATC-3'      |
| CYP27A1 | NM_001190430.1 | R 5'-TTCAGCCAAGGCTTCAGGTC-3'<br>F 5'-CTCACGTGGGCCCTATACCA-3'     |
| CYP2E1  | XM_002718772.3 | R 5'-ACACAAACTGGGTGTTCTTGG-3'<br>F 5'-AGTACTCCTTGGCTGCAGGT-3'    |
| CYP7A1  | NM_001170929.1 | R 5'-TCCGTGCTGTGTTTGTCTTC-3'<br>F 5'-TGACATGCCAGTACTAGACAGC-3'   |
| CYP7B1  | XM_008255573.2 | R 5'-AGGAACCATCCTCAAGGTGC-3'<br>F 5'-CCTGGTCTACCTAGAAAGCGTC-3'   |
| CYP8B1  | NM_001082622.1 | R 5'-AGGCAGAAGTTCCCGGTTTC-3'<br>F 5'-ATACACTTGGCCAGCACCAA-3'     |
| DDIT3   | XM_017350485.1 | R 5'-TCAGGTAGCCAGCCTTGAAC-3'<br>F 5'-ACACCTGAAAGCAGAACTGAG-3'    |
| DGAT1   | XM_008253884.1 | R 5'-CCTCCTGCAAGTCCTCATACC-3'<br>F 5'-GTGTGGTGATGCTGATCCTGA-3'   |
| DGAT2   | XM_008263828.2 | R 5'-CAGGCGTTTCTCAACCTGGA-3'<br>F 5'-TTCCTCGTGCTAGGAGTGGC-3'     |
| FABP1   | XM_002709637.3 | R 5'-TTTCTTGGGCGTGTTCCAGT-3'<br>F 5'-CGGGAAGCACTTCAAGCTCA-3'     |

|              |                |                                                                  |
|--------------|----------------|------------------------------------------------------------------|
| FASN         | KF201292.1     | R 5'-CAGCTTCACCACTGTCTTGACC-3'<br>F 5'-CAACTACGGCTTTGCCAACTC-3'  |
| FDFT1        | XM_008248858.2 | R 5'-CGATGACCGTGTCGTTGGTG-3'<br>F 5'-GTGTGTGTTGTCTGCCCTCA-3'     |
| HMGCR        | XM_017339036.1 | R 5'-ATACCGCATGGCGCATTTC-3'<br>F 5'-GGGTATTGCTGGCCTCTTCA-3'      |
| HMGCS1       | XM_008262167.2 | R 5'-AGCTTCATTCAAGCCCGTCA-3'<br>F 5'-AATGAGCAGGCATCCACAGAG-3'    |
| HMOX1        | XM_002711415.3 | R 5'-CAGGCATGGTGAAAGAGCTGTG-3'<br>F 5'-CCGAGGGTTTTAAGCTGGT-3'    |
| HTGL         | NM_001082032.1 | R 5'-TAGACCGGGTTCTCCTTGTTG-3'<br>F 5'-ACAAAGCCTAAGACCAGAGCCAT-3' |
| IL-1 $\beta$ | NM_001082201.1 | R 5'-ATGGAGCCGAATCTGACAGC-3'<br>F 5'-TCTGCAACACCTGGGATGAC-3'     |
| IL-18        | NM_001122940.1 | R 5'-CATGGAGAACACCACTTGTTGG-3'<br>F 5'-GAACCAGAAGAGGCTTGCAT-3'   |
| LDLR         | NM_001278865.1 | R 5'-TCTGATTCCAGGTTCTCATCG-3'<br>F 5'-AGCAACCGCATCTACTGGTC-3'    |
| MDR1         | NM_001082159.1 | R 5'-TGCTGATGACGGTGTCGTAG-3'<br>F 5'-TACAGAAAGTGAGAAGGTGGTC-3'   |
| MFE2         | XM_008254935.2 | R 5'-ACAAGTATCTCCCATCTCCCA-3'<br>F 5'-GCAGCTTGTTTGAGGTTGGA-3'    |
| MRP2         | XM_008270326.2 | R 5'-GGCTTGCTGGCATTATCGAAG-3'<br>F 5'-ACCGGAATTTGGAACCCACA-3'    |
| MTTP         | XM_002716956.3 | R 5'-ATATGCAGTGGTGCCCTTGA-3'<br>F 5'-AGCTCCCTTCAGGCGATTTG-3'     |
| MYD88        | XM_002723869.3 | R 5'-GCAAATACCGCCTTGACAT-3'<br>F 5'-TGTCTCTCGACTCTTGGAAGT-3'     |
| NCEH1        | XM_008266500.2 | R 5'-CTCAGCTTTGCTACGAGAACA-3'<br>F 5'-GCGCACAGCAAGTGAGTAAC-3'    |
| NCF1         | NM_001082102.2 | R 5'-CCTGGCTTGAGAGAGCCTTC-3'<br>F 5'-AGTGAGAGCACCAAGCGGAAG-3'    |
| NLRP3        | XM_017339176.1 | R 5'-CCTCTGTCCTCATTCTGGAAACA-3'<br>F 5'-ACCTCAACAAGCGCTACACA-3'  |
| NQO1         | XM_002711667.3 | R 5'-CCAGGATGGTCTTCCCGATG-3'<br>F 5'-GAAGGACATCACAGGCAAGCTG-3'   |

|         |                |                                 |
|---------|----------------|---------------------------------|
|         |                | R 5'-CCTTCAGAATGGCAGGGACTC-3'   |
| NPC1L1  | NM_001082228.1 | F 5'-TTCCACAAGTACCTGCCCTG-3'    |
|         |                | R 5'-TGAAGCGGGTGGCTACAATC-3'    |
| NTCP    | NM_001082768.1 | F 5'-GACAAGGTGCCCTATGGAGG-3'    |
|         |                | R 5'-AGAGGACAGCAACCGCTATG-3'    |
| OATP1B3 | XM_008259567.2 | F 5'-AGTCTAAGTCCAGGTGATCGT-3'   |
|         |                | R 5'-TCAGTGCGAGAGCTACCAAG-3'    |
| PERK    | XM_017340230.1 | F 5'-CAGACGAGTTCGTCCGAGAG-3'    |
|         |                | R 5'-CGCAGGACACAGTTCAAAGC-3'    |
| PUMA    | XM_017338809.1 | F 5'-ATGGGACTTCTGCCCTTACC-3'    |
|         |                | R 5'-GCTGGGAGTCCCGTATGCTA-3'    |
| SOD1    | NM_001082627.2 | F 5'-ACCATCCACTTCGAGCAGAAG-3'   |
|         |                | R 5'-GTCCTGTTATGCGTCCCTTGA-3'   |
| SOD2    | XM_008263745.2 | F 5'-CAACGGTGGAGGTCACATCA-3'    |
|         |                | R 5'-AGCAGTGGAATAAGGCCTTTGG-3'  |
| SQLE    | XM_017341522.1 | F 5'-TTCTGCCACAGATGATTCCCT-3'   |
|         |                | R 5'-GCAACAGCAAAGAAGTGTCCA-3'   |
| SR-BI   | NM_001082788.1 | F 5'-TTGCCGAGATGAACGACTCC-3'    |
|         |                | R 5'-TCGGAGTGCCAGAAGTTCAC-3'    |
| SREBP2  | XM_002721384.3 | F 5'-GACGCCAAGATGCACAAGTC-3'    |
|         |                | R 5'-TAGGTCGATGCCCTTCAGGA-3'    |
| TGFβ    | XM_008249704.2 | F 5'-ACTGCTTCAGCTCCACAGAG-3'    |
|         |                | R 5'-CAGGACCTTGCTGTACTGGG-3'    |
| TLR2    | NM_001082781.1 | F 5'-CGCTGAAAAACCTGACCGAC-3'    |
|         |                | R 5'-TGTGTATCCGTGTGCTGGAC-3'    |
| TLR4    | NM_001082732.2 | F 5'-TG TTCACAGAAAATGCCAGGA-3'  |
|         |                | R 5'-GTAATATTGGGAACGACCTCCAC-3' |
| TNFα    | NM_001082263.1 | F 5'-GCCCACGTAGTAGCAAACCC-3'    |
|         |                | R 5'-GTGAGTGAGGAGCACGTAGG-3'    |
| VLDLR   | NM_001082188.1 | F 5'-CTCAGTGCATCCCAGTGTCC-3'    |
|         |                | R 5'-CTGCACGTTACATTGCCACAG-3'   |

---

**Supplementary Table 3. Primary antibodies for western blotting.**

| Protein name                                | Abbreviation | Manufacturer                      | Catalog no. |
|---------------------------------------------|--------------|-----------------------------------|-------------|
| 4-hydroxy-nonenal                           | 4-HNE        | JalCA<br>(Shizuoka, Japan)        | MHN-100P    |
| glyceraldehyde-3-phosphate<br>dehydrogenase | GAPDH        | GeneTex<br>(Hsinchu City, Taiwan) | GTX28245    |

**Supplementary Figure 1. Full-length blots of 4-HNE.**

The bands within the boxed area were used in the analysis.  
The band intensity was quantified and demonstrated in Fig. 6C.

**• 4-HNE**

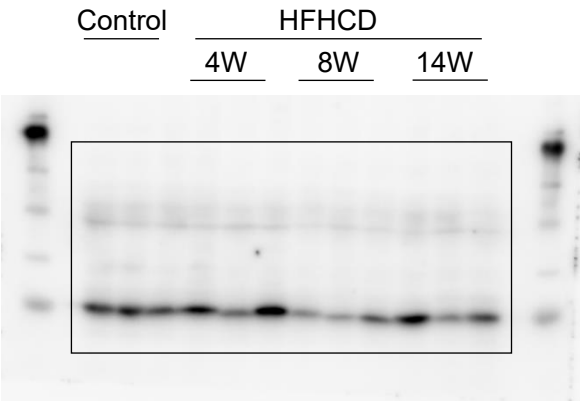

**• GAPDH**

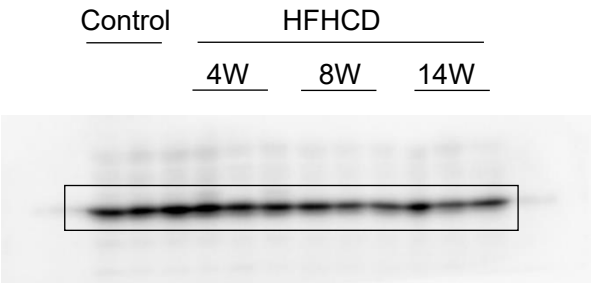

Supplement: s1 [file s1]
